# Supplementary material for: BET Bromodomain Blockade Mitigates Intimal Hyperplasia in Rat Carotid Arteries
Source: PubMed Central journal article supplement (PMC4740308; doi:10.1016/j.ebiom.2015.09.045), 2015-09-28

## Supplemental figures

### Figure legends

#### ***Figure S1. BRD4 immunostaining and Van Gieson staining of human veins and arteries***

In order to confirm the anatomical neointimal localization of the intense immunostaining of BRD4 (refer to Figure 1) in human saphenous vein grafts and internal mammary artery grafts (in contrast to normal human vein and artery specimens), Van Gieson staining was performed on the sections adjacent to the ones used for BRD4 immunostaining. Shown are Van Gieson-stained distinct medial and neointimal layers. Arrowhead marks the internal elastic lamina (IEL). Scale bar: 50  $\mu\text{m}$ .

#### ***Figure S2. PDGF-BB stimulated BRD4 up-regulation in rat aortic smooth muscle cells***

A. Rat aortic SMCs were treated with either solvent control or PDGF-BB (final 10 ng/ml), and cells were collected at the indicated time points for BRD4 Western blotting assay.

B. Quantification: mean  $\pm$  SEM; n = 3 independent experiments; \*P<0.05 compared to solvent control.

#### ***Figure S3. Zero hour images of scratch cell migration assay***

Bright-field images were taken immediately after a cell-free gap was made by scratching the confluent SMC layer on the bottom of the well, as described in Methods. The same cell culture plates were imaged after 24h incubation (see Figure 4A).

#### ***Figure S4. Zero hour images of scratch cell migration assay***

Bright-field images were taken immediately after a cell-free gap was made by scratching the confluent SMC layer on the bottom of the well, as described in Methods. The same cell culture plates were imaged after 24h incubation (see Figure 5D).

#### ***Figure S5. PDGFR $\beta$ expression after treatment with JQ1(+) in vitro***

Levels of PDGFR $\beta$  mRNA and protein were determined by RT-PCR and Western blotting, respectively, using rat aortic SMCs treated with JQ1(+), JQ1(-), or equal volume of DMSO. RT-PCR was determined for cells after 6h treatment; Western blotting was performed with cells treated for 24h. Quantification is presented as mean  $\pm$  SEM; n=3 independent experiments; \*P<0.05 compared to vehicle control.

**Figure S6. Time course of post-injury PDGFR $\alpha$  up-regulation in the rat carotid artery**

Immunohistochemistry on rat carotid artery sections showing increase of PDGFR $\alpha$  at days 3, 7, and 14 after balloon angioplasty. “Negative staining” refers to background control without using a primary antibody. Arrowhead: internal elastic lamina (IEL). Neointima is defined between lumen and IEL. Scale bar: 50  $\mu$ m.

**Figure S7. Zero hour images of human endothelial cell migration assay**

Bright-field images were taken immediately after a cell-free gap was made by scratching the confluent human aortic EC layer on the bottom of the well, as described in Methods. The same cell culture plates were imaged after 24h incubation (see Figure 8).

**Figure S8. Effect of siRNA knockdown of BRD2 and BRD3 on rat smooth muscle cell proliferation**

BRD2 (A) or BRD3 (B) was knocked down using siRNAs as described in Methods. SMC proliferation (BrdU assay) was performed 24h after PDGF-BB stimulation. Specificity of knockdown is indicated by a lack of changes in mRNA levels of other BET members. Quantification: mean  $\pm$  SEM; n=3; \*P<0.05 versus scrambled siRNA control.

**Figure S9. Time courses of BRD2 and BRD3 expression after PDGF-BB stimulation**

BRD2 (A) and BRD3 (B) mRNA levels were measured by RT-PCR at indicated time points after PDGF-BB treatment of rat aortic SMCs. Control: solvent; PDGF-BB:10 ng/ml. Quantification: mean  $\pm$  SEM; n = 3 independent experiments.

**Figure S1**

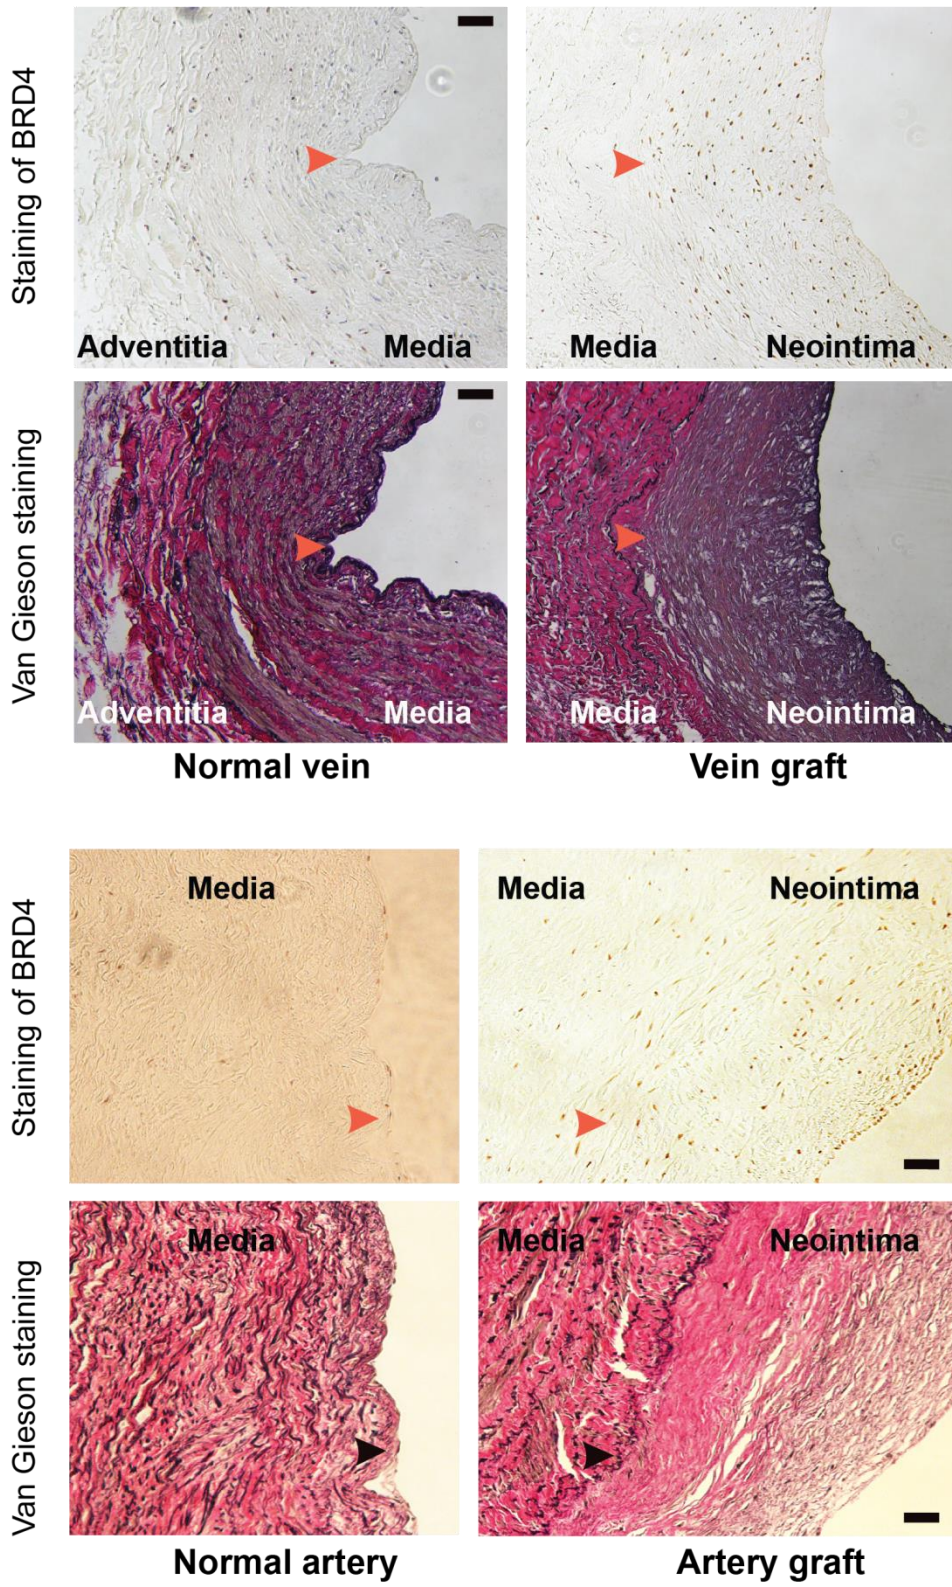

Figure S2

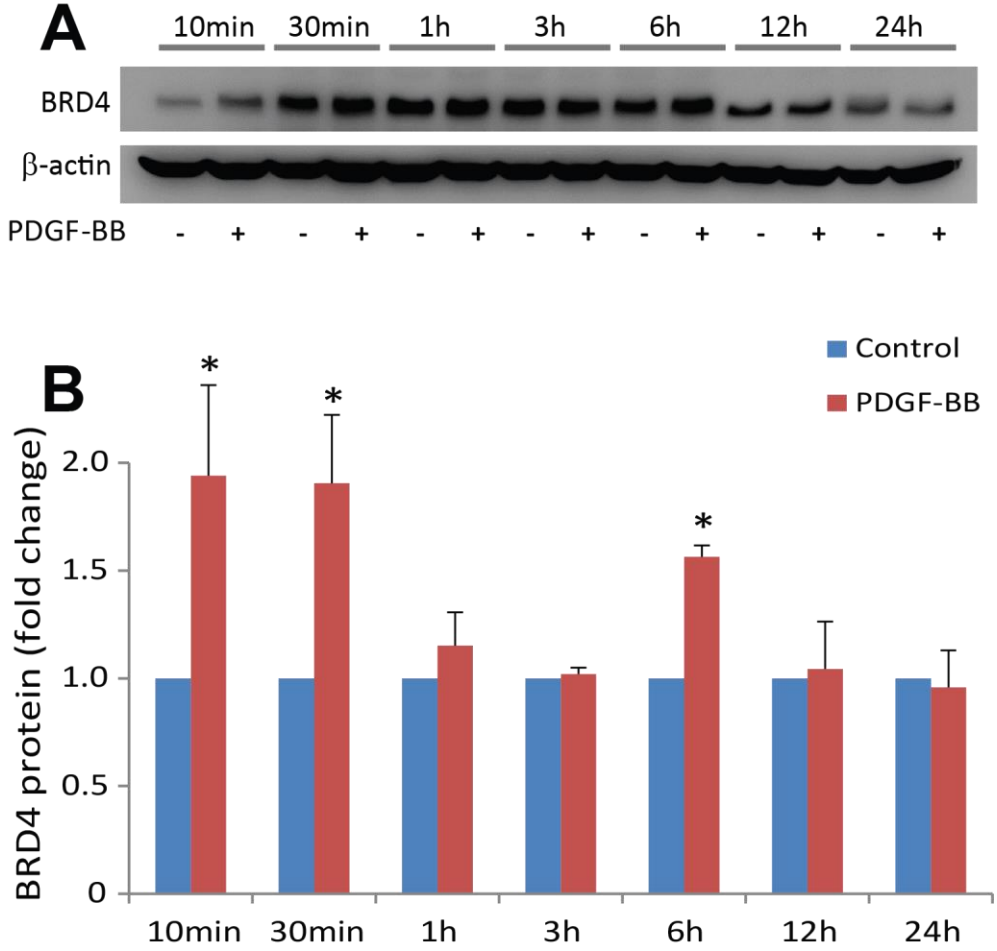

**Figure S3**

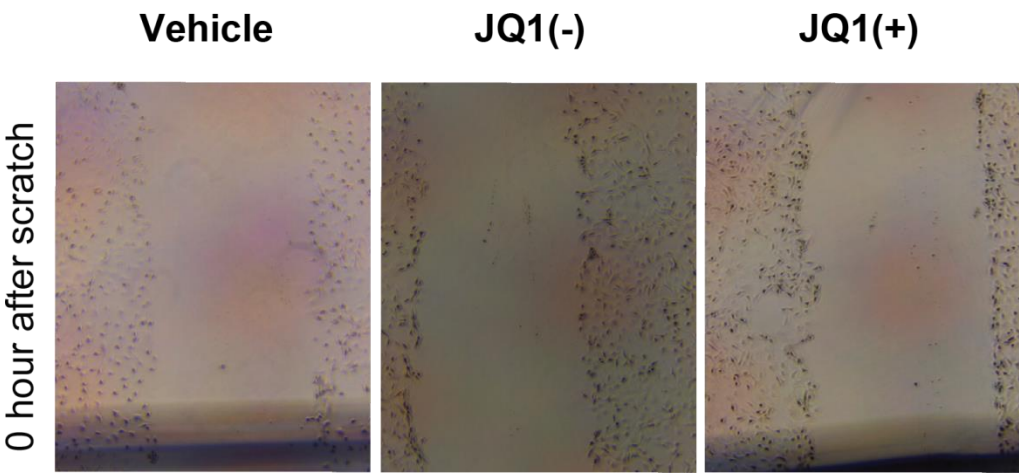

**Figure S4**

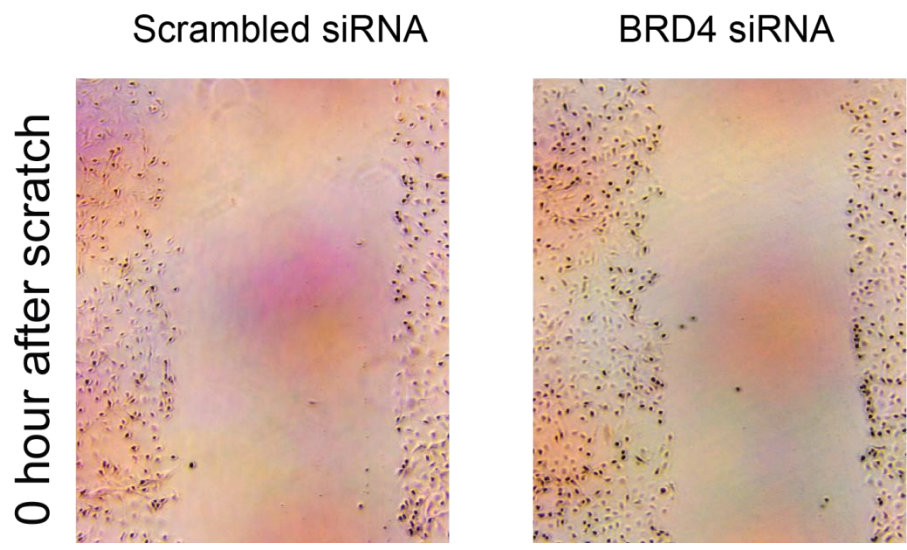

**Figure S5**

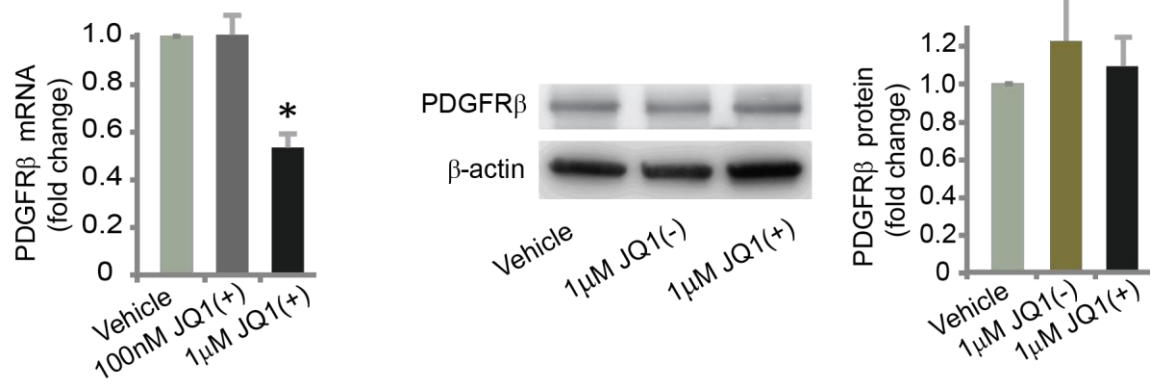



**Figure S6**

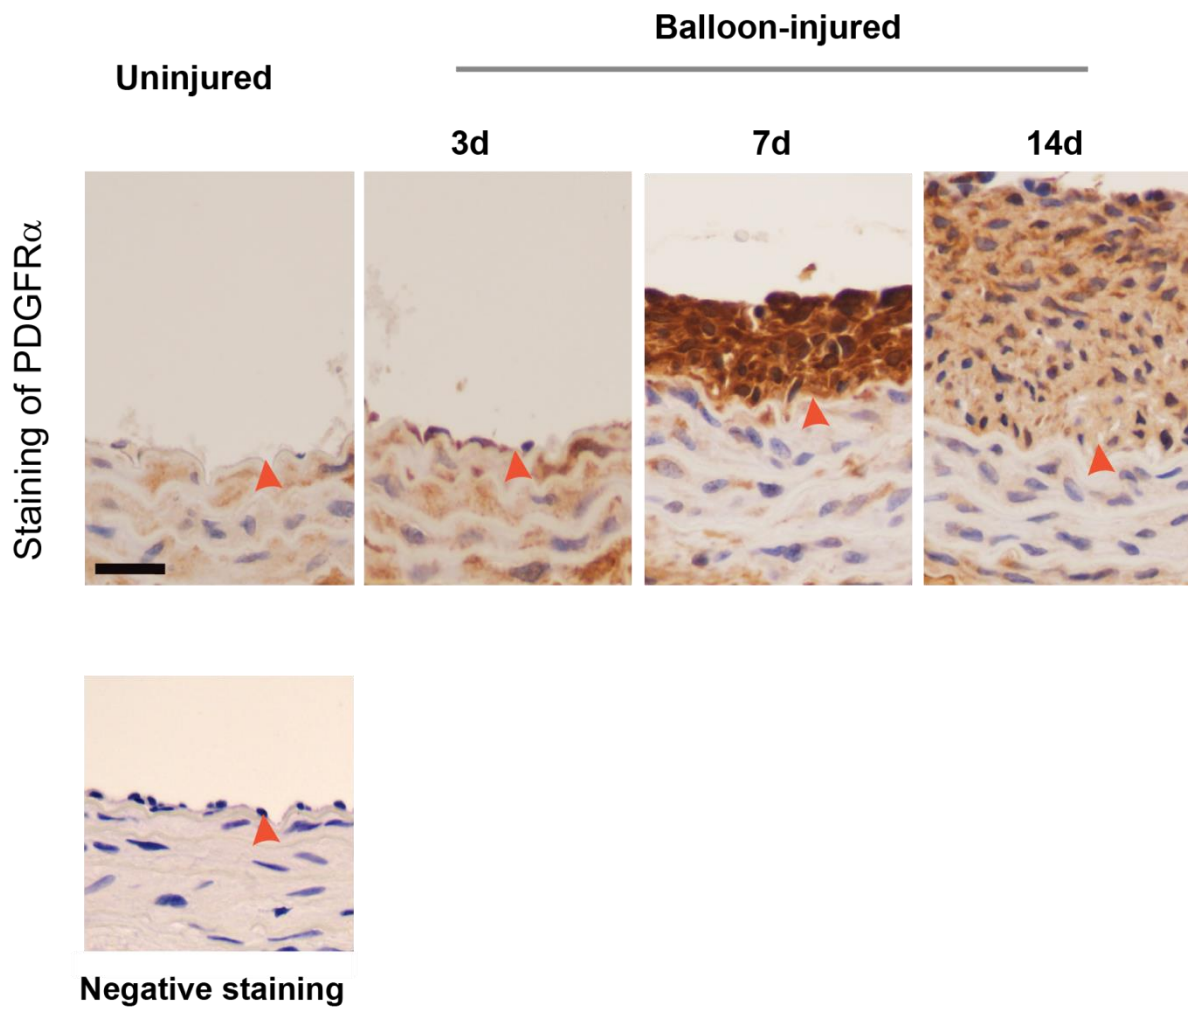



Figure S7

0 hour after scratch

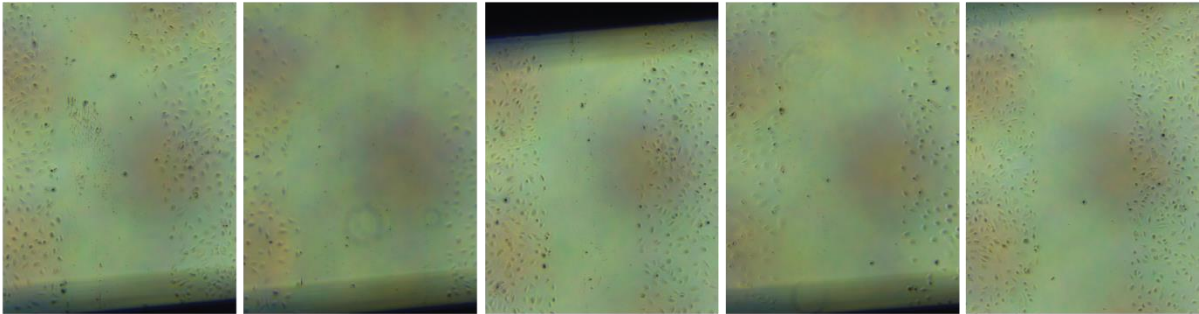

|              |   |   |   |   |   |
|--------------|---|---|---|---|---|
| TNF $\alpha$ | - | + | + | - | - |
| IL-1 $\beta$ | - | - | - | + | + |
| JQ1(+)       | - | - | + | - | + |

Figure S8

## A BRD2 knockdown

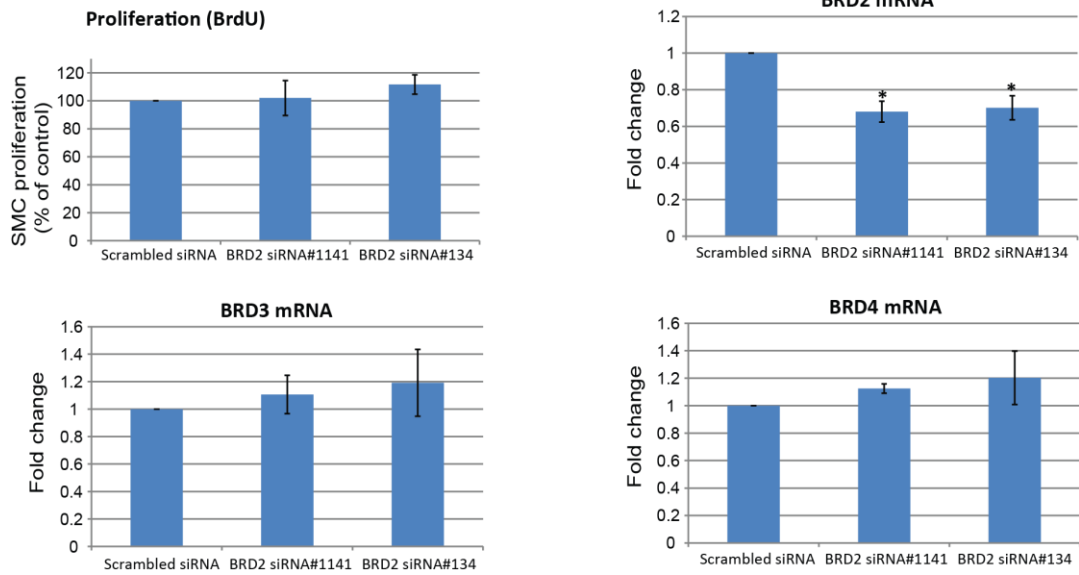

## B BRD3 knockdown

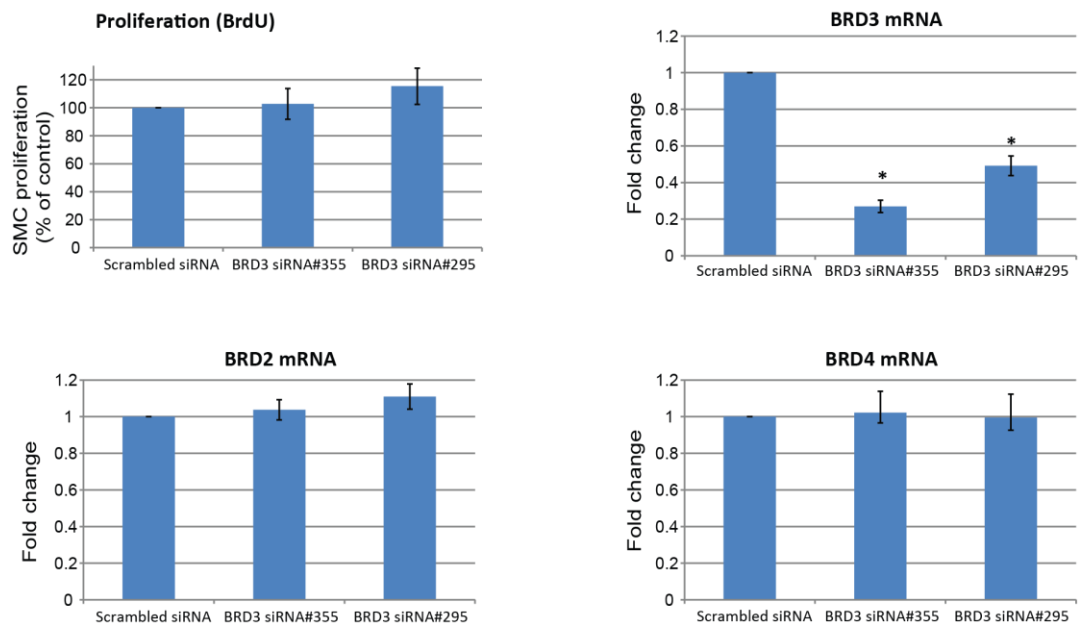

Figure S9

**A BRD2**

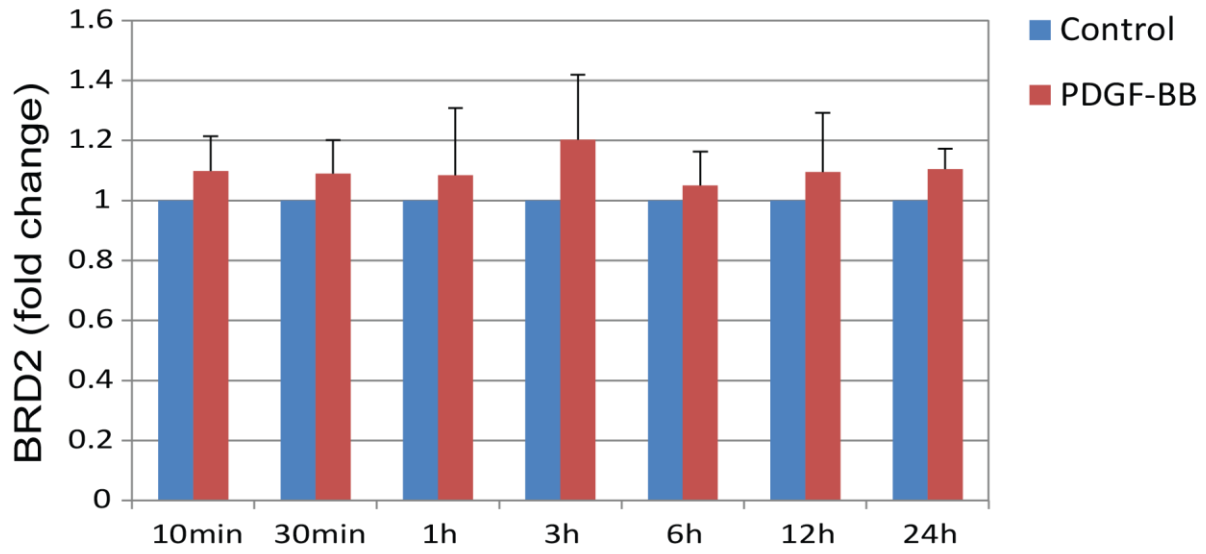

**B BRD3**

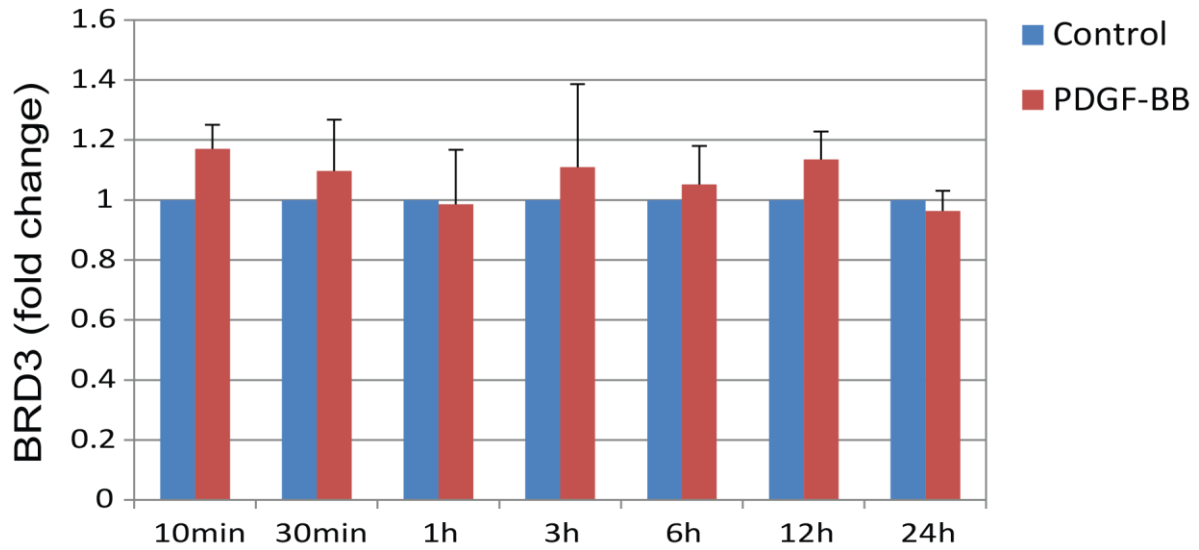

Supplement: mmc1.pdf [file mmc1.pdf]
